# Supplementary material for: A retrospective observational study of clinicopathological features of KRAS, NRAS, BRAF and PIK3CA mutations in Japanese patients with metastatic colorectal cancer
Source: BMC Cancer. 2015 Apr 11;15:258. doi: 10.1186/s12885-015-1276-z (PMC4393591; doi:10.1186/s12885-015-1276-z)
Supplement: Additional file 1: — The genotypes of all samples using HGVS nomenclature. [file 12885_2015_1276_MOESM1_ESM.xlsx]

## Sheet: Addtional file 1
	Additional file 1. The genotypes of all samples using HGVS nomenclature
	Gene	Amino acid	DNA	n = 264
	KRAS codon 61			3
		p.Q61K	c.181C>A	0
		p.Q61E	c.181C>G	0
		p.Q61L	c.182A>T	0
		p.Q61P	c.182A>C	0
		p.Q61R	c.182A>G	2
		p.Q61H	c.183A>C	1
	KRAS codon 146			7
		A146T	c.436G>A	5
		A146S	c.436G>T	0
		A146P	c.436G>C	0
		A146E	c.437C>A	0
		A146V	c.437C>T	2
		A146G	c.437C>G	0
	BRAF codon 600			14
		p.V600E	c.1799T>A	14
	NRAS codon 12			5
		p.G12S	c.34G>A	1
		p.G12C	c.34G>T	0
		p.G12R	c.34G>C	0
		p.G12D	c.35G>A	3
		p.G12V	c.35G>T	1
		p.G12A	c.35G>C	0
	NRAS codon 13			2
		p.G13S	c.37G>A	0
		p.G13C	c.37G>T	0
		p.G13R	c.37G>C	0
		p.G13D	c.38G>A	2
		p.G13V	c.38G>T	0
		p.G13A	c.38G>C	0
	NRAS codon 61			4
		p.Q61K	c.181C>A	2
		p.Q61E	c.181C>G	0
		p.Q61L	c.182A>T	0
		p.Q61P	c.182A>C	0
		p.Q61R	c.182A>G	2
		p.Q61H	c.183A>T	0
	PIK3CA Exon 9			13
		p.E542K	c.1624G>A	7
		p.E545K	c.1633G>A	6
		p.E546K	c.1636C>A	0
	PIK3CA Exon 20			4
		p.H1047R	c.3140A>G	3
		p.H1047L	c.3140A>T	1
